# Supplementary material
Source: ML conference proceedings conference paper supplement (https://openaccess.thecvf.com/content/WACV2021/html/Karkkainen_FairFace_Face_Attribute_WACV_2021_paper.html)
Supplement: Supplementary file 1 [file Karkkainen_FairFace_Face_Attribute_WACV_2021_supplemental.pdf]

# FairFace: Face Attribute Dataset for Balanced Race, Gender, and Age for Bias Measurement and Mitigation – Supplementary Information –

Table 8: Classification accuracy on external validation datasets.

|         |              | Race Classification   |             |             |             |             |             |             |             |             |             |             |             |             |             |             |             |
|---------|--------------|-----------------------|-------------|-------------|-------------|-------------|-------------|-------------|-------------|-------------|-------------|-------------|-------------|-------------|-------------|-------------|-------------|
|         |              | All                   | Female      | Male        | White       | Non-White   | Black       | Asian       | E Asian     | SE Asian    | Latino      | Indian      | Mid-East    | 0-9         | 10-29       | 30-49       | 50+         |
| Twitter | FairFace     | <b>.733</b>           | <b>.726</b> | <b>.737</b> | .899        | <b>.548</b> | <b>.695</b> | <b>.888</b> | .705        | .465        | .305        | <b>.492</b> | .743        | <b>.756</b> | <b>.691</b> | <b>.768</b> | <b>.777</b> |
|         | UTKFace      | .544                  | .543        | .544        | .741        | .354        | .591        | .476        | -           | -           | -           | .474        | -           | .606        | .516        | .574        | .567        |
|         | LFWA+        | .626                  | .596        | .647        | <b>.965</b> | .284        | .283        | .425        | -           | -           | -           | -           | -           | .639        | .562        | .705        | .751        |
| Media   | FairFace     | <b>.866</b>           | <b>.874</b> | <b>.863</b> | .949        | <b>.685</b> | <b>.890</b> | <b>.918</b> | .886        | .152        | .267        | <b>.691</b> | .704        | <b>.833</b> | <b>.853</b> | <b>.852</b> | <b>.893</b> |
|         | UTKFace      | .772                  | .795        | .763        | .883        | .546        | .802        | .588        | -           | -           | -           | .599        | -           | .646        | .755        | .757        | .804        |
|         | LFWA+        | .679                  | .823        | .835        | <b>.978</b> | .393        | .485        | .578        | -           | -           | -           | -           | -           | .682        | .656        | .651        | .722        |
| Protest | FairFace     | <b>.846</b>           | <b>.849</b> | <b>.844</b> | .935        | <b>.683</b> | <b>.859</b> | <b>.843</b> | .702        | .510        | .169        | <b>.649</b> | .779        | <b>.839</b> | <b>.821</b> | <b>.837</b> | <b>.881</b> |
|         | UTKFace      | .706                  | .723        | .697        | .821        | .536        | .714        | .456        | -           | -           | -           | .591        | -           | .681        | .658        | .685        | .787        |
|         | LFWA+        | .747                  | .759        | .741        | <b>.964</b> | .366        | .418        | .488        | -           | -           | -           | -           | -           | .689        | .645        | .668        | .801        |
| Average | FairFace     | <b>.815</b>           | <b>.816</b> | <b>.815</b> | .928        | <b>.639</b> | <b>.815</b> | <b>.883</b> | .764        | .376        | .247        | <b>.611</b> | .742        | <b>.809</b> | <b>.788</b> | <b>.819</b> | <b>.850</b> |
|         | FairFace 18K | .800                  | .812        | .795        | .917        | .588        | .779        | .856        | .685        | .355        | .279        | .502        | .625        | .786        | .773        | .809        | .827        |
|         | FairFace 9K  | .774                  | .788        | .768        | .885        | .564        | .756        | .827        | .641        | .315        | .281        | .531        | .544        | .723        | .757        | .789        | .787        |
|         | LFWA+        | .674                  | .687        | .668        | .815        | .479        | .702        | .507        | -           | -           | -           | .555        | -           | .644        | .643        | .672        | .719        |
|         | LFWA+        | .684                  | .726        | .741        | <b>.969</b> | .348        | .395        | .497        | -           | -           | -           | -           | -           | .670        | .621        | .675        | .758        |
|         |              | Gender Classification |             |             |             |             |             |             |             |             |             |             |             |             |             |             |             |
|         |              | All                   | Female      | Male        | White       | Non-White   | Black       | Asian       | E Asian     | SE Asian    | Latino      | Indian      | Mid-East    | 0-9         | 10-29       | 30-49       | 50+         |
| Twitter | FairFace     | <b>.940</b>           | .948        | <b>.935</b> | <b>.949</b> | <b>.932</b> | <b>.894</b> | <b>.864</b> | <b>.942</b> | <b>.963</b> | <b>.932</b> | <b>.976</b> | <b>.817</b> | <b>.932</b> | <b>.973</b> | <b>.959</b> |             |
|         | UTKFace      | .884                  | .859        | .899        | .897        | .874        | .864        | .829        | .803        | .871        | .901        | .898        | .947        | .671        | .874        | .933        | .912        |
|         | LFWA+        | .797                  | .637        | .899        | .815        | .773        | .789        | .724        | .716        | .736        | .804        | .728        | .911        | .634        | .769        | .857        | .859        |
|         | CelebA       | .829                  | <b>.955</b> | .750        | .850        | .812        | .818        | .764        | .716        | .839        | .843        | .831        | .876        | .539        | .818        | .889        | .881        |
| Media   | FairFace     | <b>.973</b>           | <b>.957</b> | <b>.980</b> | <b>.976</b> | <b>.969</b> | <b>.953</b> | <b>.956</b> | <b>.967</b> | <b>.891</b> | <b>.980</b> | <b>.977</b> | <b>.988</b> | <b>.821</b> | <b>.952</b> | <b>.984</b> | <b>.979</b> |
|         | UTKFace      | .927                  | .841        | .961        | .928        | .915        | .907        | .908        | .915        | .869        | .928        | .945        | .932        | .679        | .917        | .931        | .924        |
|         | LFWA+        | .887                  | .656        | .976        | .893        | .871        | .851        | .864        | .875        | .804        | .859        | .897        | .944        | .688        | .835        | .832        | .911        |
| Protest | CelebA       | .899                  | .950        | .880        | .909        | .881        | .847        | .858        | .857        | .870        | .925        | .884        | .926        | .560        | .860        | .908        | .924        |
|         | FairFace     | <b>.957</b>           | <b>.944</b> | <b>.963</b> | <b>.962</b> | <b>.951</b> | <b>.957</b> | <b>.887</b> | <b>.879</b> | <b>.906</b> | <b>.970</b> | <b>.973</b> | <b>.991</b> | <b>.861</b> | <b>.934</b> | <b>.967</b> | <b>.976</b> |
|         | UTKFace      | .901                  | .829        | .934        | .905        | .873        | .911        | .814        | .802        | .843        | .902        | .918        | .921        | .611        | .812        | .924        | .919        |
|         | LFWA+        | .829                  | .567        | .954        | .841        | .801        | .821        | .758        | .782        | .697        | .811        | .811        | .929        | .568        | .705        | .851        | .908        |
| Average | CelebA       | .882                  | .935        | .856        | .893        | .866        | .876        | <b>.892</b> | .750        | .833        | .892        | .878        | .956        | .492        | .842        | .904        | .927        |
|         | FairFace     | <b>.957</b>           | <b>.950</b> | <b>.959</b> | <b>.962</b> | <b>.951</b> | <b>.947</b> | <b>.912</b> | <b>.903</b> | <b>.913</b> | <b>.971</b> | <b>.961</b> | <b>.985</b> | <b>.833</b> | <b>.939</b> | <b>.975</b> | <b>.971</b> |
|         | FairFace 18K | .941                  | .930        | .946        | .946        | .934        | .931        | .891        | .886        | .895        | .955        | .960        | .967        | .803        | .920        | .957        | .962        |
|         | FairFace 9K  | .926                  | .921        | .927        | .929        | .921        | .922        | .864        | .851        | .883        | .942        | .951        | .974        | .760        | .901        | .949        | .943        |
|         | UTKFace      | .904                  | .843        | .931        | .910        | .887        | .894        | .850        | .840        | .861        | .910        | .920        | .933        | .654        | .868        | .929        | .918        |
|         | LFWA+        | .838                  | .620        | .943        | .850        | .815        | .820        | .782        | .791        | .746        | .825        | .812        | .928        | .630        | .847        | .893        |             |
|         | CelebA       | .870                  | .947        | .829        | .884        | .853        | .847        | .838        | .774        | .847        | .887        | .864        | .919        | .530        | .840        | .900        | .911        |
|         |              | Age Classification    |             |             |             |             |             |             |             |             |             |             |             |             |             |             |             |
|         |              | All                   | Female      | Male        | White       | Non-White   | Black       | Asian       | E Asian     | SE Asian    | Latino      | Indian      | Mid-East    | 0-9         | 10-29       | 30-49       | 50+         |
| Twitter | FairFace     | <b>.578</b>           | <b>.586</b> | <b>.573</b> | <b>.563</b> | <b>.590</b> | <b>.557</b> | <b>.620</b> | <b>.629</b> | <b>.606</b> | <b>.581</b> | <b>.576</b> | <b>.555</b> | <b>.805</b> | <b>.666</b> | <b>.439</b> | <b>.408</b> |
|         | UTKFace      | .366                  | .355        | .384        | .343        | .385        | .338        | .397        | .382        | .419        | .411        | .356        | .345        | .585        | .499        | .104        | .307        |
| Media   | FairFace     | <b>.516</b>           | <b>.511</b> | <b>.517</b> | <b>.513</b> | <b>.520</b> | <b>.483</b> | <b>.557</b> | <b>.559</b> | <b>.543</b> | <b>.537</b> | <b>.532</b> | <b>.475</b> | <b>.714</b> | <b>.686</b> | <b>.447</b> | <b>.501</b> |
|         | UTKFace      | .275                  | .273        | .282        | .281        | .267        | .271        | .276        | .279        | .261        | .231        | .292        | .222        | .511        | .529        | .112        | .238        |
| Protest | FairFace     | <b>.515</b>           | <b>.543</b> | <b>.502</b> | <b>.498</b> | <b>.539</b> | <b>.527</b> | <b>.584</b> | <b>.605</b> | <b>.531</b> | <b>.507</b> | <b>.581</b> | <b>.469</b> | <b>.885</b> | <b>.687</b> | <b>.395</b> | <b>.478</b> |
|         | UTKFace      | .302                  | .306        | .294        | .291        | .319        | .305        | .316        | .318        | .312        | .314        | .371        | .318        | .516        | .503        | .114        | .349        |
| Average | FairFace     | <b>.536</b>           | <b>.547</b> | <b>.531</b> | <b>.525</b> | <b>.550</b> | <b>.522</b> | <b>.587</b> | <b>.598</b> | <b>.560</b> | <b>.542</b> | <b>.563</b> | <b>.500</b> | <b>.801</b> | <b>.680</b> | <b>.427</b> | <b>.462</b> |
|         | FairFace 18K | .492                  | .508        | .484        | .485        | .496        | .463        | .528        | .538        | .506        | .510        | .454        | .490        | .700        | .646        | .387        | .410        |
|         | FairFace 9K  | .470                  | .493        | .459        | .462        | .478        | .449        | .506        | .515        | .483        | .473        | .458        | .463        | .662        | .611        | .361        | .394        |
|         | UTKFace      | .314                  | .311        | .320        | .305        | .324        | .305        | .330        | .326        | .331        | .319        | .340        | .295        | .537        | .510        | .110        | .298        |
